# Supplementary material
Source: PubMed Central journal article supplement (PMC5458608)
Supplement: NIHMS863040-supplement-1.pdf [file NIHMS863040-supplement-1.pdf]

A

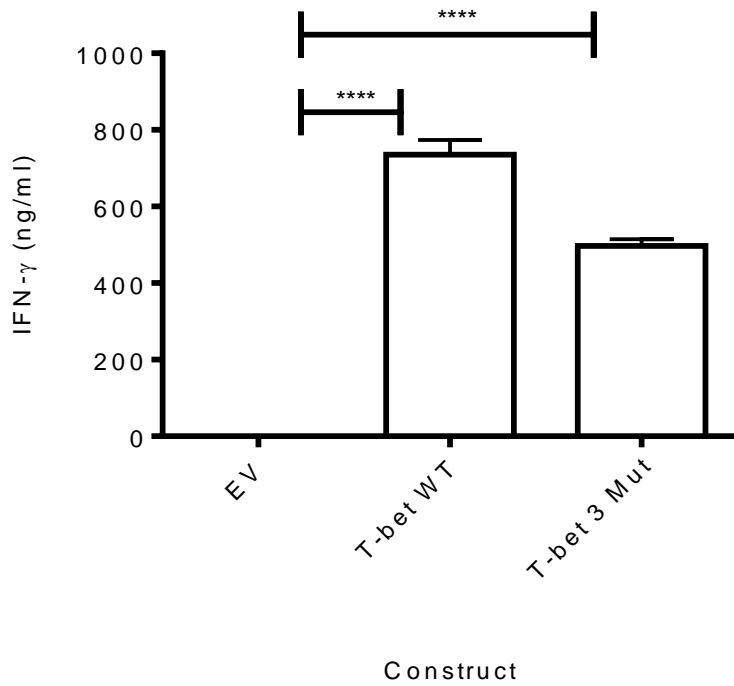

B

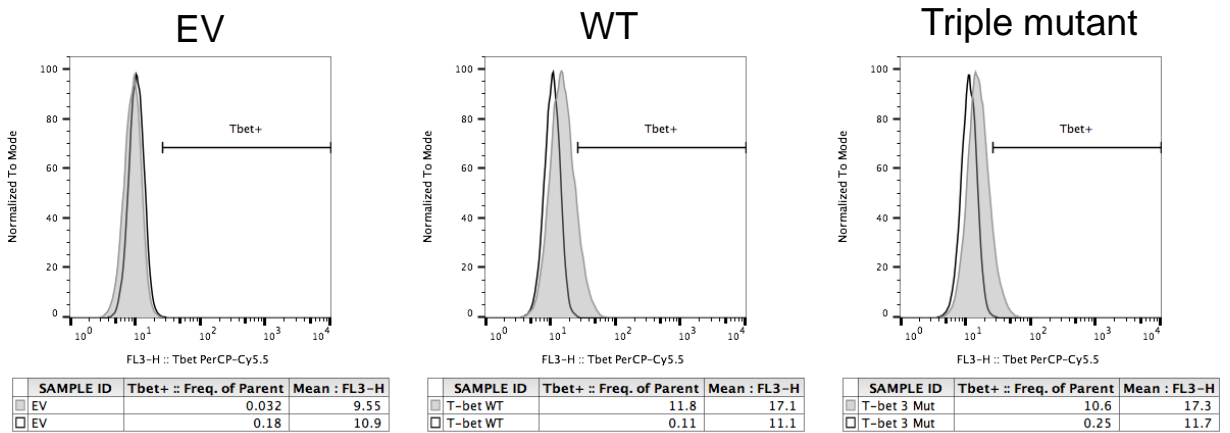

C

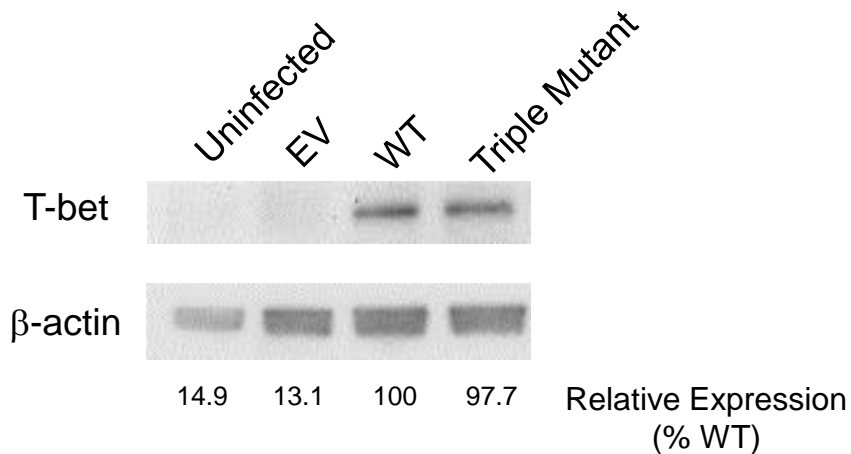

Supplemental Fig 1. A. Equal amounts of GFP<sup>+</sup> EL4 cells stably transduced with either WT/triple mutant T-bet or empty vector were plated and stimulated with PMA/Ionomycin overnight. Supernatants were harvested and analyzed for IFN $\gamma$  production using ELISA. B. The same transduced EL4 cells that were used for ELISA were stained for T-bet. C. EL4 cells stably transduced with either WT/triple mutant T-bet or empty vector were lysed in RIPA buffer and 30  $\mu$ g of protein was separated by SDS-PAGE and transferred to PVDF membrane. Western blot was performed with anti T-bet (eBioscience, clone eBio4B10) or anti b-actin (Cell Signaling, clone D6A8) and anti-mouse IgG-HRP or anti-rabbit IgG-HRP, respectively (GE Healthcare). Protein expression was detected using ECL-Prime reagent (GE Healthcare) and quantified on a UVP Biochemi 500 imaging system. Relative expression is T-bet area density/b-actin area density with WT T-bet expression normalized to 100. Results shown are representative of 3 independent experiments.

A

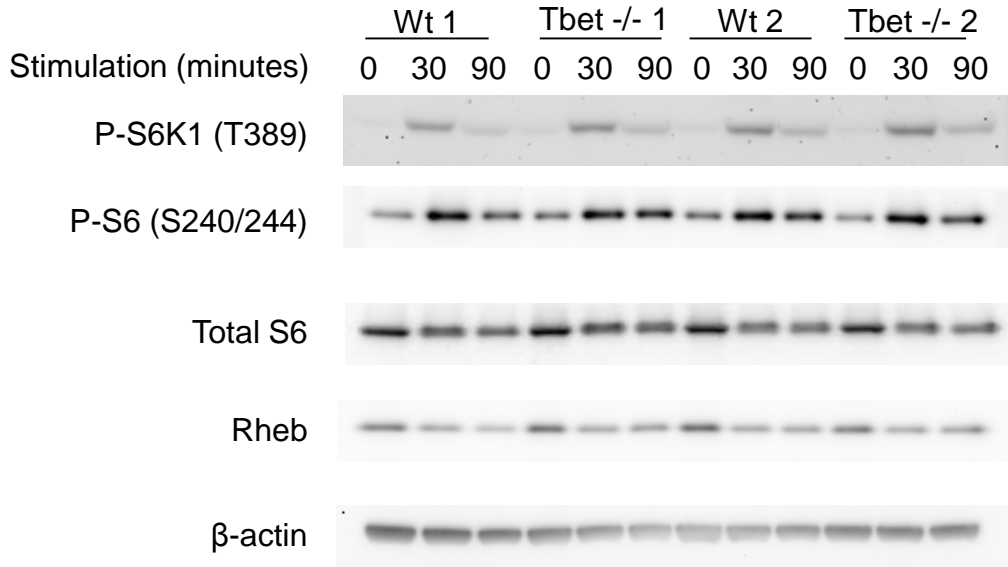

B

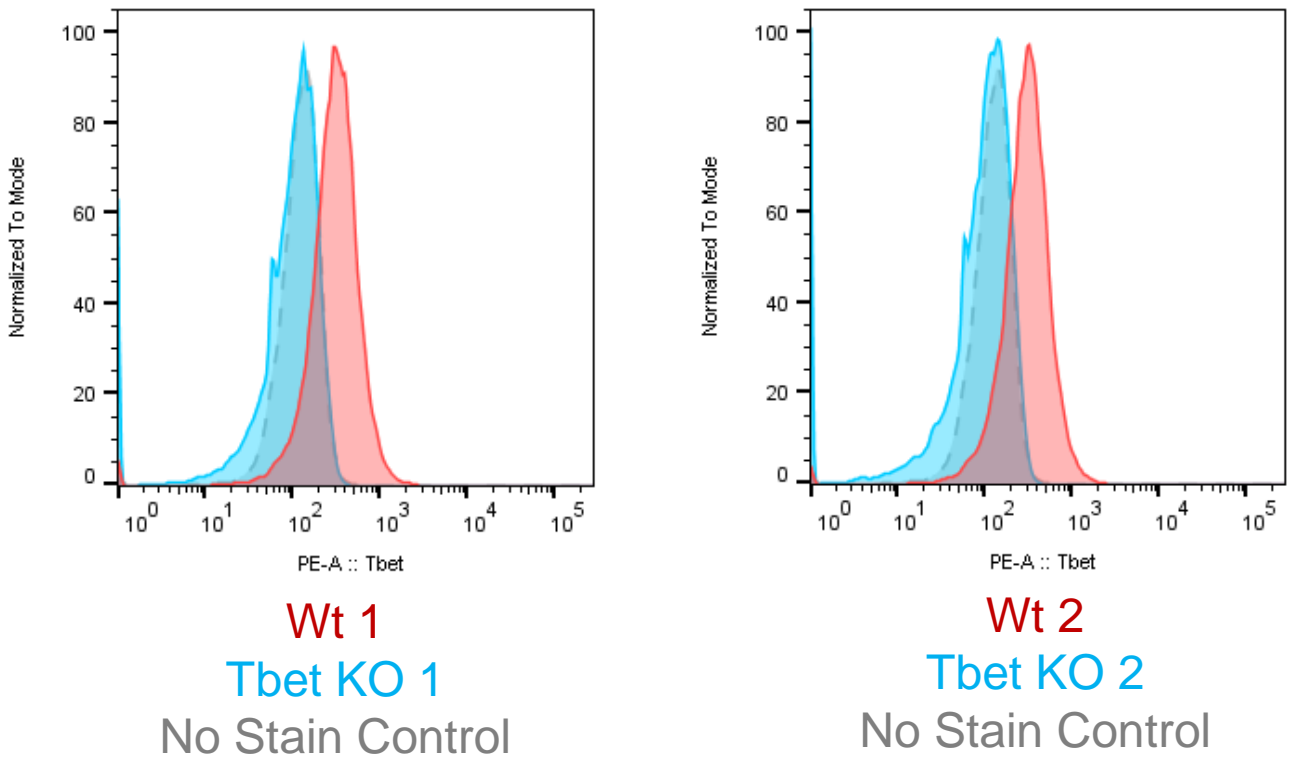

Supplemental Figure 2. A. CD4<sup>+</sup> T cells were isolated from either WT or T-bet KO mice and stimulated with 3  $\mu\text{g/ml}$  plate-bound anti-CD3 and 2  $\mu\text{g/ml}$  of soluble anti-CD28 antibody. Stimulated cells were harvested at indicated time points and pS6K1, pS6, total S6, Rheb and  $\beta$ -actin expression were measured by Western blot. B. CD4<sup>+</sup> T cells from WT and T-bet KO mice were stimulated as in A in the presence of IL-12 and T-bet expression was measured after 72 hours by flow cytometry. Results shown are representative of 2 independent experiments with 2 biological replicates of each genotype per experiment.

# Supplemental figure 3

## A

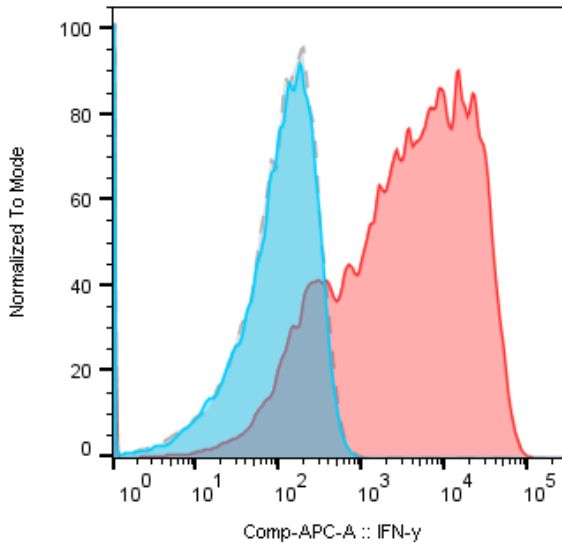

Wt 1 Stim  
Tbet KO 1 Stim  
No Stim Control

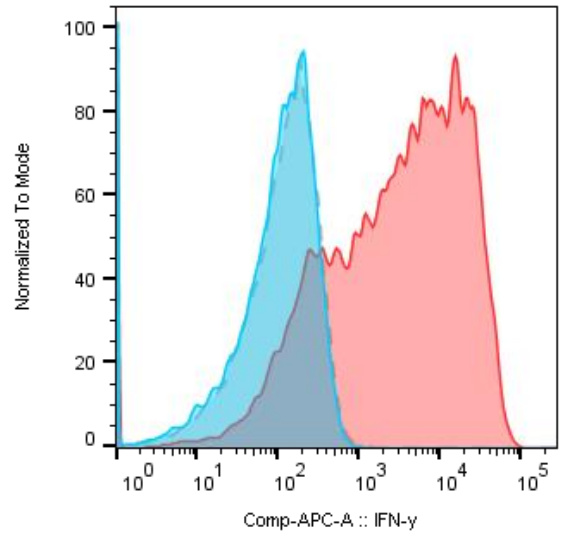

Wt 2 Stim  
Tbet KO 2 Stim  
No Stim Control

## B

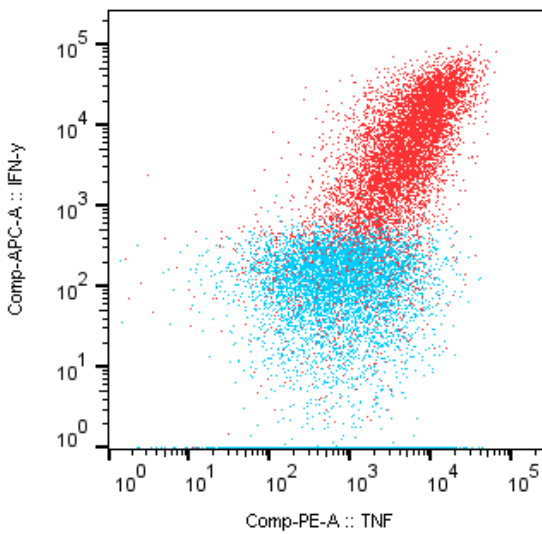

Wt 1 Stim  
Tbet KO 1 Stim

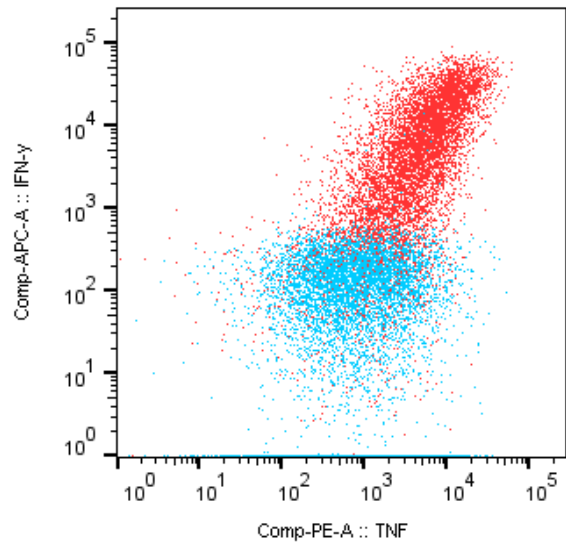

Wt 2 Stim  
Tbet KO 2 Stim

IFN-y ↑  
TNFα →

Supplemental Figure 3. CD4<sup>+</sup> T cells cultured as in Supplemental Figure 1B were stimulated with PMA/ionomycin in the presence of Golgi transport inhibitor for 6 hours. IFN $\gamma$  (A) and TNF $\alpha$  (B) expression was measured by intracellular cytokine staining. Data are representative of staining of cells from 4 WT and 4 KO mice.

# Supplemental figure 4

A

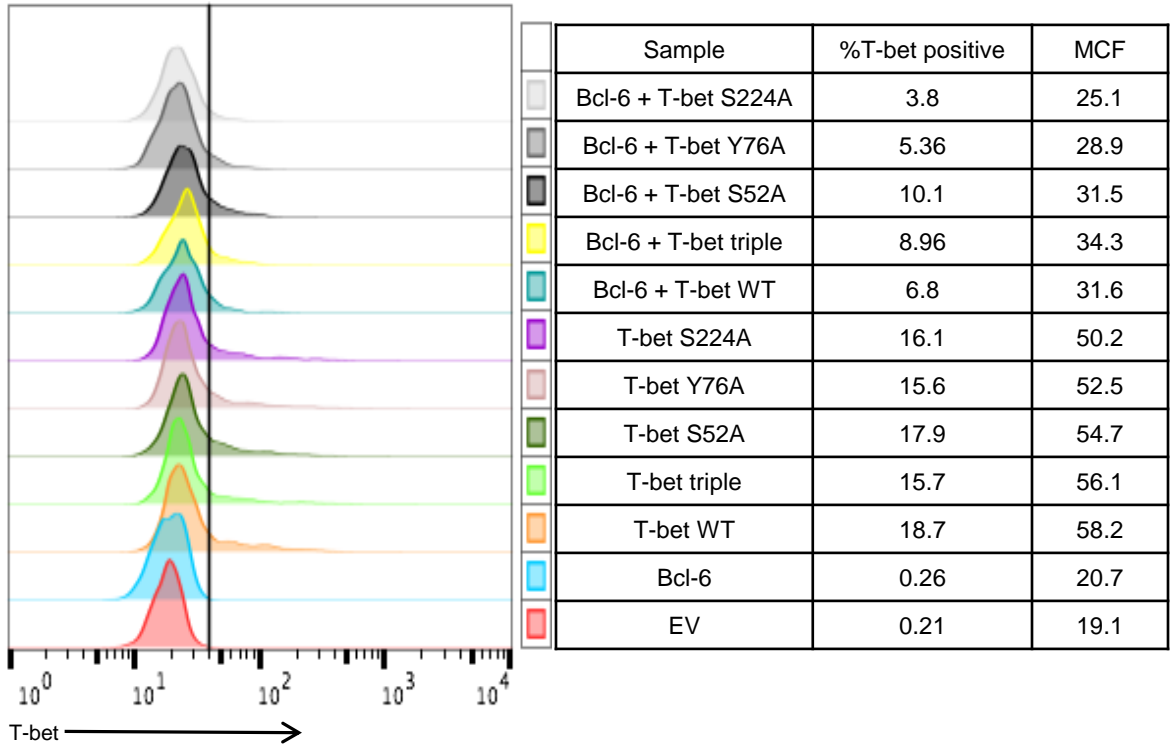

B

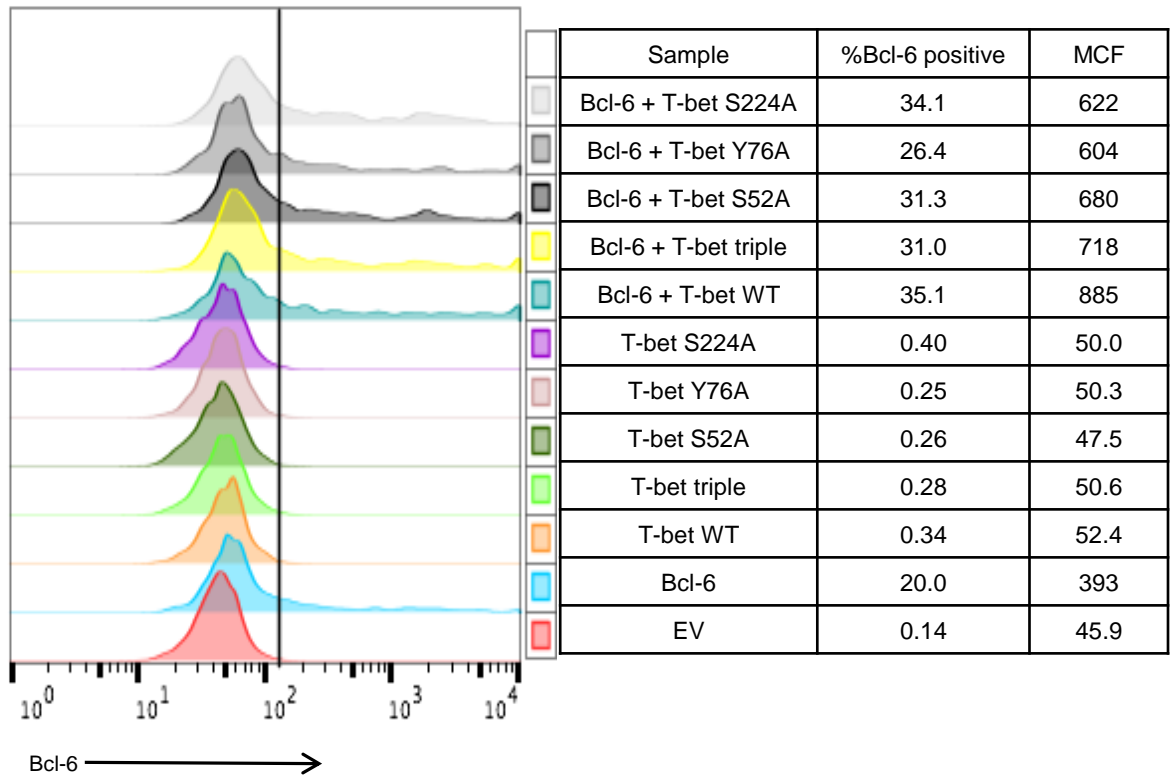

Supplemental Fig 4. EL4 cells were co-transfected with either WT/mutant T-bet or empty vector (EV) and SOCS3 luciferase reporter plasmid in the absence or presence of Bcl-6, as in Figure 8C. A. T-bet expression levels were measured by intracellular protein staining detected by flow cytometry and are depicted as % T-bet positive cells and mean channel fluorescence (MCF), gated on live, GFP+ transfected cells. B. Bcl-6 levels were measured in the same manner as in A. Results shown are representative of 3 independent experiments.
